# Supplementary material for: A zinc finger protein gene signature enables bladder cancer treatment stratification
Source: Aging (Albany NY). 2021 May 7;13(9):13023–38. doi: 10.18632/aging.202984 (PMC8148496; doi:10.18632/aging.202984)
Supplement: Supplementary Table 1 [file aging-13-202984-s001.xls]

Supplementary Table 1. The DEGs related-ZNFs in bladder cancer.
upregulated gene	logFC	pValue		downregulated gene	logFC	pValue
MEX3A	2.675006749	1.92E-08		ZNF4	-0.500217308	0.000314883
MCM2	2.376923505	1.47E-09		XPA	-0.500799532	1.42E-06
UHRF1	2.268208976	7.30E-11		SALL2	-0.507105013	0.018636098
ZNF488	2.056177177	3.58E-05		OSR2	-0.510232193	0.002486823
DNMT3B	1.981223614	1.56E-08		MBNL3	-0.511064129	6.15E-05
TCF19	1.896173639	6.65E-08		JMJD1C	-0.517583571	0.000226283
ZNF117	1.832594913	0.000163967		UBR1	-0.538879047	4.53E-05
TRIM17	1.716834084	4.28E-05		ZFP2	-0.549582068	2.94E-06
ZBED2	1.708716428	0.003394129		GLI2	-0.55011455	3.56E-06
ZNF432	1.668567856	2.10E-05		PCGF5	-0.559318013	0.000167728
ZNF114	1.614196	1.06E-07		CASZ1	-0.560198837	1.67E-05
POLD1	1.612485262	1.75E-10		ZNF671	-0.561627211	0.000146325
HIC2	1.564437793	0.000605763		RNF11	-0.562925151	3.79E-07
RACGAP1	1.528314362	1.04E-07		ZXDB	-0.565006226	1.08E-05
SP6	1.524757292	0.004562588		ZRANB1	-0.565798229	9.27E-06
ZNF761	1.52352829	1.53E-07		RORB	-0.573904099	4.54E-09
ZIC2	1.419025065	7.10E-05		THAP2	-0.574166626	1.25E-05
TRAIP	1.409906449	7.57E-10		SNAI1	-0.577205831	0.002798337
ZNF692	1.406947003	4.53E-07		RORA	-0.57751106	1.82E-07
PARP12	1.396755119	3.71E-07		ZNF438	-0.577936003	4.28E-05
PCGF2	1.384920782	3.83E-09		EBF4	-0.585698645	0.000926479
SALL4	1.359158659	1.89E-08		LONRF3	-0.587221739	0.000450936
PLEKHF1	1.358282346	0.007009509		ZMAT1	-0.587883659	1.25E-05
RNF186	1.353852155	0.028122286		BCL6B	-0.61011076	0.001344958
DNMT1	1.315611835	4.59E-08		ZBTB38	-0.618045943	0.001226498
ZSCAN16	1.30119562	2.40E-06		RNF152	-0.618294734	0.001024803
TRIM24	1.296290662	0.000192051		PYGO1	-0.61841571	7.75E-05
DBF4	1.287040238	3.38E-10		KLF13	-0.645955576	3.27E-05
SMYD2	1.28017045	2.39E-09		TSHZ2	-0.646503112	2.81E-07
TRIT1	1.270789443	3.43E-07		FOXP1	-0.648031082	2.28E-05
BRCA1	1.256592515	6.53E-09		NR3C1	-0.65309443	5.46E-05
NEIL3	1.243322051	2.41E-08		DZIP1	-0.661139978	4.95E-05
VAV2	1.216797207	2.19E-05		KLF12	-0.661287122	0.000221299
RNF213	1.215073573	3.16E-05		PHF1	-0.663577633	8.49E-06
CIT	1.193761885	2.07E-08		TRIM2	-0.664022782	0.000245473
DTX3L	1.171095538	1.13E-06		ZSCAN18	-0.67319944	0.000266181
ZMYND19	1.156032949	6.79E-08		ZC3H12C	-0.674924771	1.65E-06
TRAF2	1.155106146	5.71E-09		PRKCA	-0.684766982	0.008626186
ZNF468	1.153071593	1.25E-06		RNF145	-0.708984598	3.56E-06
ANAPC11	1.150666315	1.26E-08		CLIP1	-0.72210079	0.000290634
ZNF92	1.148799468	1.85E-08		ZMYND11	-0.722172205	0.000105138
ZNF600	1.138473433	2.73E-06		ZHX2	-0.724364624	7.04E-07
RFWD3	1.132935242	1.63E-08		EBF2	-0.724860351	1.16E-07
ZNF107	1.132012304	2.01E-06		SNAI3	-0.725683944	0.004787247
GATA3	1.126530932	0.009144453		ZNF154	-0.743514717	2.07E-07
PCGF1	1.12555034	3.68E-11		KLF11	-0.745431305	0.0025338
SNRPC	1.123859421	4.81E-09		GLI1	-0.747618301	2.63E-06
MTMR4	1.112264553	2.20E-07		ZNF521	-0.750497206	3.37E-06
MEX3D	1.105999062	6.14E-07		ACAP1	-0.777386476	0.029896311
NR2F6	1.105743852	1.45E-05		TSHZ1	-0.77969318	4.27E-07
ZNF706	1.095789833	3.69E-06		ZNF331	-0.780470968	0.000179503
APEX2	1.067997339	2.74E-08		PRKD1	-0.781276365	0.000236568
ZNF205	1.054403262	1.46E-08		EBF3	-0.786163339	2.02E-08
GIT1	1.041612313	3.75E-09		MYRIP	-0.789202446	3.72E-10
ZNHIT2	1.035692446	1.05E-06		RNF38	-0.79520273	0.000233092
PCGF3	1.015991028	4.01E-06		LONRF1	-0.797550856	3.46E-06
VAV3	1.003962987	0.00418993		PEG3	-0.801406363	2.84E-09
POLE	1.002305992	3.01E-09		OSR1	-0.803243658	0.000111859
PYGO2	1.002119908	4.15E-09		RASA3	-0.807283389	4.87E-05
FBXO5	0.999449365	6.38E-07		RARB	-0.813939134	2.24E-05
RAD18	0.994196808	7.91E-09		DGKB	-0.817704437	3.67E-08
ZNF841	0.992887336	5.50E-05		AR	-0.828035397	5.69E-06
TRIM65	0.992851294	8.20E-08		TRPS1	-0.843526032	6.93E-06
RNF207	0.992811207	7.87E-05		AKAP13	-0.867879185	1.12E-07
FANCL	0.99131972	2.01E-07		MID2	-0.869521512	7.04E-07
ZNF93	0.981802502	6.45E-06		RUNX1T1	-0.883925142	1.04E-07
FBXL19	0.980807748	1.03E-06		KLF15	-0.884943446	5.37E-05
ZNF296	0.975442748	0.000396632		ZNF25	-0.89907706	1.57E-05
ARFGAP1	0.974395965	2.34E-09		CALCOCO1	-0.902086092	9.59E-07
ZNF74	0.973487258	3.67E-08		HIC1	-0.907048125	2.60E-08
SHARPIN	0.968110806	7.07E-09		RXRG	-0.908076619	1.46E-12
PRKCZ	0.965111779	4.76E-07		REV3L	-0.921958264	2.42E-06
GLI4	0.964595653	4.14E-05		PGR	-0.932816196	4.46E-11
SCNM1	0.961565257	7.01E-08		ZFHX4	-0.933443633	1.28E-05
MAZ	0.96113159	4.27E-07		KLF17	-0.935469946	0.003317781
DBF4B	0.96019805	4.26E-10		ROCK1	-0.943411479	0.000631547
ADAP1	0.956785618	0.001812496		CREB5	-0.958545205	3.08E-09
POLR2K	0.948372709	2.56E-06		FBXO30	-0.964216459	9.50E-05
CBLC	0.945817435	0.000409324		ZHX3	-0.968258201	1.46E-06
CXXC5	0.940652208	0.003488115		KLF10	-0.972396168	7.81E-05
TRIM11	0.939869924	3.71E-07		ROCK2	-0.989766498	0.000419966
RNF208	0.923659872	0.005106445		ZFP36L1	-0.999585527	6.20E-07
ZFYVE19	0.919626612	1.85E-08		STAC	-1.002330192	6.87E-06
TTF2	0.918688057	1.35E-08		UTRN	-1.002685066	5.27E-08
ZNF121	0.917485894	0.000117165		DGKG	-1.021329388	2.56E-06
ZNF682	0.905290815	0.000211639		MBNL1	-1.023838709	4.61E-05
STAC3	0.904801866	4.84E-06		PRDM8	-1.03681706	2.05E-07
RNFT2	0.895222538	3.75E-08		ZBTB4	-1.097670091	2.52E-08
ZSWIM4	0.885936865	2.42E-05		RNF112	-1.115108756	4.87E-11
TRMT1	0.885346756	6.70E-07		FHL5	-1.157483528	5.97E-09
TRIM45	0.877093113	0.000199374		ZBTB47	-1.173461591	1.09E-06
ZNF581	0.875124369	7.83E-07		RNF180	-1.195702392	4.39E-09
ZNF524	0.87343688	6.45E-06		CDC42BPA	-1.212552046	1.96E-05
RBCK1	0.872921012	5.05E-07		NEURL1B	-1.218639049	6.06E-05
ZC3H3	0.872513354	1.19E-09		ZEB2	-1.218970787	1.70E-08
ZNF43	0.872257292	0.001017959		BNC2	-1.240017457	9.87E-07
XAF1	0.872158507	0.02947116		FOXP2	-1.286811743	1.59E-08
CPSF4	0.869396903	1.72E-08		LONRF2	-1.301430363	1.79E-06
SF3A2	0.868531542	3.12E-08		PRDM1	-1.338267939	0.021996996
TRAF4	0.865504771	0.002270772		THRA	-1.378293527	1.09E-07
ZNF133	0.860983643	2.36E-08		TNFAIP3	-1.40307945	0.000101131
PHF6	0.860711588	8.79E-06		PRKCB	-1.43565929	5.41E-10
ZNF675	0.859660333	7.31E-06		CDKN1A	-1.456050322	0.000250963
ZNF579	0.856674515	8.38E-05		ZFPM2	-1.472757888	1.25E-06
ZNF697	0.855584697	6.51E-07		KLF6	-1.490462565	2.95E-07
EIF2S2	0.852037147	1.35E-07		ESR1	-1.491993405	1.53E-07
TRIM28	0.851252728	3.33E-07		TSHZ3	-1.492144006	1.13E-07
ZMYND8	0.850277489	0.000270118		NR2F1	-1.528054148	5.84E-09
HGS	0.850049384	3.55E-08		ZBTB16	-1.576640536	3.38E-10
ZNF813	0.846902189	8.72E-06		JAZF1	-1.589208623	5.85E-07
DNMT3A	0.843972768	4.23E-06		PJA2	-1.61662911	1.96E-08
ZNF707	0.843075038	3.66E-09		RASGRP2	-1.628760196	3.05E-09
ZNF480	0.841293809	4.04E-06		EBF1	-1.639280051	2.78E-10
GTF3A	0.83329533	1.63E-06		FYCO1	-1.696648936	8.06E-07
RNF181	0.833183117	2.44E-07		TRIM63	-1.72699163	0.000486418
RP9	0.832056734	1.44E-08		RNF122	-1.795315935	5.99E-08
ZNF681	0.824974805	3.98E-05		TIPARP	-1.883178738	1.54E-06
MTF2	0.819617564	8.64E-08		SOBP	-1.962208057	5.61E-10
ZNF436	0.816733887	0.008204934		RNF150	-2.024683041	4.50E-09
WRNIP1	0.815366214	3.23E-07		NR3C2	-2.065187605	1.83E-10
TRIM59	0.814007459	2.21E-09		EGR2	-2.100425526	1.02E-08
ZNF91	0.810883437	0.027290473		GATA6	-2.285108523	6.68E-11
DGKZ	0.810859973	5.46E-07		ZEB1	-2.295470843	1.97E-07
ZNF83	0.809879943	0.001552595		ZCCHC24	-2.339659728	6.88E-10
ZNF69	0.802001592	0.005047016		KLF4	-2.352227376	5.32E-11
SMYD5	0.79812591	2.93E-08		KLF9	-2.39599476	3.04E-11
ZBTB33	0.798013769	6.01E-06		PDZRN3	-2.427010368	5.96E-10
ZNHIT1	0.797550781	3.23E-07		GATA5	-2.48990005	8.51E-10
TRIM27	0.793673437	2.03E-06		DTNA	-2.507679087	6.11E-08
RNFT1	0.791790692	6.17E-06		DMD	-2.5685776	3.75E-08
ZNF687	0.789863612	3.49E-06		KLF2	-2.688620805	4.75E-12
ZNF195	0.782759373	8.38E-05		NR4A2	-2.756656584	1.56E-10
ESCO2	0.781639659	1.31E-07		ZFP36	-2.87165072	3.96E-10
ZNF28	0.781309944	1.46E-05		PDZRN4	-2.956833448	1.72E-09
ZNF702P	0.773126997	0.003841696		EGR3	-3.232674652	7.66E-12
RNF144A	0.770347626	0.001847655		NR4A3	-3.335272363	5.29E-12
FOXP4	0.768845711	2.96E-06		EGR1	-3.350345551	1.41E-11
ZNF253	0.766606116	0.000526722		NR4A1	-3.807149879	2.15E-12
ZBED4	0.758853136	2.14E-06		FHL1	-4.109546023	4.81E-11
ZNF341	0.756596648	2.54E-08
PML	0.755334677	0.001110323
ZNF700	0.754167403	5.96E-05
NFXL1	0.752374319	3.69E-06
ZNF260	0.750332279	2.23E-05
NPLOC4	0.747519416	5.22E-08
POLR1B	0.7474385	3.46E-06
RAPSN	0.745522555	0.00014193
ZBTB12	0.742289238	0.001944498
NHLRC1	0.742102992	0.001186581
ZSWIM1	0.73748234	5.05E-07
ZFP62	0.736840089	0.000299242
ZNF623	0.73469872	2.72E-05
AGAP2	0.733206653	0.002921813
RNF126	0.731219913	4.53E-05
ZKSCAN4	0.728691243	3.98E-07
AGAP6	0.727410616	2.17E-05
PIAS3	0.727289812	0.000454147
ZNF696	0.727210134	1.36E-08
PLAGL2	0.725425293	0.000653809
POLR2I	0.72405846	5.69E-06
ZNF254	0.722903572	0.003888112
ZMIZ2	0.721927156	8.72E-06
ZNF85	0.721840711	1.27E-05
ZNF587	0.720095158	8.38E-05
DDX41	0.7193611	7.39E-08
ZNF544	0.717803988	4.57E-07
ZNHIT3	0.715467704	2.93E-08
ZNF787	0.713714958	1.47E-06
ZNF691	0.710421518	1.06E-05
TRIM25	0.709749343	0.000568919
MZF1	0.70949469	0.000348488
CYHR1	0.708705991	3.52E-05
ZSCAN2	0.708294007	1.44E-06
ZNF3	0.705184164	3.34E-06
GMIP	0.703159857	0.002994584
ZNF823	0.698693648	0.021887879
INO80B	0.6972189	1.70E-05
DTX2	0.696074761	0.000227968
POLR3K	0.695704787	1.60E-06
GATAD2A	0.695227299	1.04E-07
ZNF320	0.691466326	0.007890124
ZNF266	0.690347722	0.001969426
SYVN1	0.688538816	8.47E-08
ZNF664	0.685984538	0.000504954
CXXC1	0.68594497	0.002994584
TOP3A	0.684673568	1.46E-06
SUZ12	0.681530234	3.58E-05
ZNF485	0.681022859	2.03E-07
DTNB	0.679236795	0.003106844
RNF135	0.67581958	4.27E-06
ZNF695	0.675584787	3.96E-10
ZNF124	0.675357367	6.20E-05
ZFP64	0.675217406	2.01E-06
ZNF146	0.670326516	0.000101921
RNF7	0.669308309	2.93E-08
E4F1	0.66820686	1.40E-06
ZNF530	0.666226453	5.97E-09
ZNF607	0.665195893	0.000128495
ZNF350	0.663234066	0.002798337
ZNF606	0.661986776	8.20E-06
PLEKHF2	0.660512951	0.001426593
ZNF514	0.659877003	4.76E-05
ANKZF1	0.659788171	3.95E-05
AGAP3	0.652356713	0.000405237
SMYD3	0.651866054	0.00154255
PRKCI	0.649794692	0.000366522
TRIM7	0.649378552	0.025373976
PRKD2	0.649352177	7.87E-05
KDM5B	0.647150671	0.001614139
ZNF473	0.645167574	7.01E-08
ZNF616	0.645079029	7.71E-06
MKRN2	0.644827183	0.00236542
USP39	0.6446915	7.24E-08
ZNF749	0.642712427	5.35E-07
ZNF714	0.638262677	0.001210385
THAP3	0.638103035	2.74E-05
ZNF282	0.637964587	5.25E-06
ZNF618	0.63570174	0.003013033
RNF8	0.63018739	3.71E-08
FEZF1	0.629216083	0.004749893
ZNF789	0.629181958	2.37E-06
ZNF526	0.628536261	1.27E-07
TNIP2	0.627772776	7.37E-06
PATZ1	0.626624841	0.028774131
HLTF	0.626111485	0.004787247
RNF2	0.622252021	5.91E-05
PIAS4	0.619028836	1.39E-07
CDC42BPG	0.618857949	0.014209385
MORC4	0.617230794	0.001259321
OVOL2	0.614155696	0.007313359
APTX	0.613519036	3.06E-05
ZNF431	0.61325052	0.000101132
RBM10	0.612743134	2.80E-06
RBM4B	0.609837434	2.83E-06
ZNF593	0.605960099	8.19E-05
ZNF558	0.605391491	0.001140266
ZNF610	0.602692995	0.009685172
ZC3HC1	0.602556337	4.53E-07
ZNF845	0.597697666	9.11E-06
ZNF22	0.59754099	0.000149704
ZNF772	0.597156909	0.000130481
ZNRD1	0.59480713	0.000808947
MTA1	0.594786053	4.91E-05
SLC2A4RG	0.59433474	0.007049425
TUT1	0.592039299	2.06E-05
ZNF572	0.591823888	0.000147443
ZNF701	0.58715017	2.59E-05
HDAC6	0.587034956	0.000133515
MTA2	0.586750409	0.0004383
ZNF224	0.585671176	5.59E-05
RNF26	0.58490012	0.000883652
ADNP	0.582684815	0.000165212
ZBTB17	0.582374183	7.39E-07
RPL37	0.58171904	0.004675727
GTF2E1	0.579151633	6.01E-06
ZNF443	0.578207284	0.007292769
ZNF786	0.576122865	7.33E-05
ZNF354A	0.574720498	0.000425996
ZNF7	0.574638094	1.99E-07
PRR3	0.571712778	0.0002802
ZFP41	0.571644796	8.00E-05
RNF34	0.570006679	3.02E-06
RAF1	0.5688083	0.005076652
ZNF513	0.567176791	0.00368318
ZNF273	0.564877891	4.68E-05
ZNF574	0.564675894	1.18E-05
ZFAND2A	0.560766015	0.000895697
RBX1	0.55862897	1.16E-05
MORC2	0.556472278	0.000110998
RNF113A	0.553727134	0.000154323
DCLRE1A	0.551914737	0.000268143
ZNF335	0.5503735	4.31E-06
ZNF444	0.54978094	0.000848411
PRMT3	0.547585961	4.25E-05
GTF2H3	0.547006329	0.000182223
ZNF232	0.546359059	0.002380293
ZNF433	0.544131422	0.001464321
LYAR	0.542617779	0.003552068
MBTD1	0.541287888	0.005381781
PLAG1	0.541027127	0.005136396
REPIN1	0.539380611	0.0120273
RNF114	0.539119693	0.000240093
ZNF385C	0.539050912	1.93E-05
RNF149	0.537969585	0.005319462
ZNF207	0.537621059	8.34E-06
ZNF184	0.537414052	0.001318719
ZMYM1	0.533737117	4.76E-05
ZC3H8	0.532491686	1.11E-05
NSMCE2	0.53185985	1.00E-05
FIZ1	0.530885029	1.17E-05
ZNF180	0.530200948	0.000114483
ZIC5	0.527185441	9.01E-05
ZC3H18	0.524924026	4.01E-06
ZNF217	0.524544128	0.016653383
TRAFD1	0.522789783	0.003488117
ZNF556	0.519990891	1.82E-05
ZNF764	0.519526177	1.44E-05
ZNF414	0.518171177	0.000236568
ZNF837	0.517862347	0.002111853
ANKIB1	0.515782739	0.000473869
ZNF550	0.515232671	0.000305854
TMEM129	0.514461101	0.024043612
ZNF768	0.512094705	0.003262493
UPF1	0.511819215	9.05E-07
ZNF428	0.511353107	0.003467034
ZNF284	0.509721847	3.07E-07
ZNF165	0.508268278	0.000345981
SP140L	0.508025382	0.004539638
ZNF613	0.50794074	0.002549639
EWSR1	0.507358142	5.45E-06
DUS3L	0.506775621	0.000526722
ZNF419	0.506265036	1.67E-07
TRAF7	0.505088736	0.000333695
CBFA2T2	0.504777091	0.015171449
ZNF182	0.504212436	0.000333695
ZNF765	0.504178748	5.79E-07
ZNF680	0.503065889	0.008023694
ZNF213	0.502247872	8.32E-05
RNF215	0.500741426	8.34E-06
